# Supplementary material for: Real-world data shows increased reactogenicity in adults after heterologous compared to homologous prime-boost COVID-19 vaccination, March−June 2021, England
Source: PubMed Central journal article supplement (PMC8284043; doi:10.2807/1560-7917.es.2021.26.28.2100634), 2021-07-15
Supplement: 21-00634_AMIRTHALINGAM_Supplement.pdf [file 21-00634_AMIRTHALINGAM_Supplement.pdf]

This supplementary material is hosted by *Eurosurveillance* as supporting information alongside the article Real-world data shows increased reactogenicity in adults after heterologous compared to homologous prime-boost COVID-19 vaccination, March-June 2021, England, on behalf of the authors who remain responsible for the accuracy and appropriateness of the content. The same standards for ethics, copyright, attributions and permissions as for the article apply. Supplements are not edited by Eurosurveillance and the journal is not responsible for the maintenance of any links or email addresses provided therein.

## S1. Participant Questionnaire

### Questionnaire One

| Your first name(s) | Your last name | Date of Birth    |
|--------------------|----------------|------------------|
|                    |                |                  |
| <b>Address</b>     |                |                  |
|                    |                | <b>Postcode:</b> |
|                    |                |                  |
| Telephone number   | Email address  |                  |
|                    |                |                  |

**Today's date:**   /   /

**Gender:**  Male  Female  Prefer not to answer

**If you are currently working, please state your occupation**

- Frontline HCW (Hospital)  Frontline HCW (Community)  Social Care Worker
- Care home worker  Other (please specify) \_\_\_\_\_
- Not currently working

**Which one of the following groups do you belong to?**

|                                                                                                                                                                                                                                                                                                                                                                                                                                    |                                                                                                                                                                                                                                                                     |
|------------------------------------------------------------------------------------------------------------------------------------------------------------------------------------------------------------------------------------------------------------------------------------------------------------------------------------------------------------------------------------------------------------------------------------|---------------------------------------------------------------------------------------------------------------------------------------------------------------------------------------------------------------------------------------------------------------------|
| <p><b>White</b></p> <p><input type="checkbox"/> English / Welsh / Scottish / Northern Irish / British</p> <p><input type="checkbox"/> Irish</p> <p><input type="checkbox"/> Gypsy or Irish Traveller</p> <p><input type="checkbox"/> Any other White background</p> <p><b>Mixed / Multiple ethnic groups</b></p> <p><input type="checkbox"/> White and Black Caribbean</p> <p><input type="checkbox"/> White and Black African</p> | <p><b>Asian / Asian British</b></p> <p><input type="checkbox"/> Indian</p> <p><input type="checkbox"/> Pakistani</p> <p><input type="checkbox"/> Bangladeshi</p> <p><input type="checkbox"/> Chinese</p> <p><input type="checkbox"/> Any other Asian background</p> |
|------------------------------------------------------------------------------------------------------------------------------------------------------------------------------------------------------------------------------------------------------------------------------------------------------------------------------------------------------------------------------------------------------------------------------------|---------------------------------------------------------------------------------------------------------------------------------------------------------------------------------------------------------------------------------------------------------------------|

|                                                                                                                                                                                                                                                                                                                         |                                                                                                                                                                                                |
|-------------------------------------------------------------------------------------------------------------------------------------------------------------------------------------------------------------------------------------------------------------------------------------------------------------------------|------------------------------------------------------------------------------------------------------------------------------------------------------------------------------------------------|
| <input type="checkbox"/> White and Asian<br><input type="checkbox"/> Any other Mixed / Multiple ethnic background<br><br><b>Black / African / Caribbean / Black British</b><br><input type="checkbox"/> African<br><input type="checkbox"/> Caribbean<br><input type="checkbox"/> Any other Black / African / Caribbean | <b>Other ethnic group</b><br><input type="checkbox"/> Arab<br><input type="checkbox"/> Any other ethnic group ( <i>state below</i> ):<br><br><br><input type="checkbox"/> Prefer not to answer |
|-------------------------------------------------------------------------------------------------------------------------------------------------------------------------------------------------------------------------------------------------------------------------------------------------------------------------|------------------------------------------------------------------------------------------------------------------------------------------------------------------------------------------------|

**Have you got any medical conditions?**     yes     no     not known

If **yes**, please give details:

**Did you have two different COVID-19 vaccines?**     yes     no     not known

| Vaccine and dose | Date of vaccination                                                                                                                                                               | Name of vaccine | Batch number |   |   |   |   |  |  |
|------------------|-----------------------------------------------------------------------------------------------------------------------------------------------------------------------------------|-----------------|--------------|---|---|---|---|--|--|
| COVID-19 dose 1  | <table border="1"> <tr><td>D</td><td>D</td></tr> </table> / <table border="1"> <tr><td>M</td><td>M</td></tr> </table> / <table border="1"> <tr><td>Y</td><td>Y</td></tr> </table> | D               | D            | M | M | Y | Y |  |  |
| D                | D                                                                                                                                                                                 |                 |              |   |   |   |   |  |  |
| M                | M                                                                                                                                                                                 |                 |              |   |   |   |   |  |  |
| Y                | Y                                                                                                                                                                                 |                 |              |   |   |   |   |  |  |
| COVID-19 dose 2  | <table border="1"> <tr><td>D</td><td>D</td></tr> </table> / <table border="1"> <tr><td>M</td><td>M</td></tr> </table> / <table border="1"> <tr><td>Y</td><td>Y</td></tr> </table> | D               | D            | M | M | Y | Y |  |  |
| D                | D                                                                                                                                                                                 |                 |              |   |   |   |   |  |  |
| M                | M                                                                                                                                                                                 |                 |              |   |   |   |   |  |  |
| Y                | Y                                                                                                                                                                                 |                 |              |   |   |   |   |  |  |

**Why did you have a different vaccine brand for your second dose?**

- I had a bad reaction to my first vaccine
- It was the only vaccine they had for my second dose
- I wanted to make sure I got this vaccine for my second dose
- I don't know why I got a different vaccine
- It was given to me by mistake
- Other reason – please describe below:

### Household Composition

- a. Number of children under 18 years in your household:
- b. Number of adults aged 18-69 years in your household:
- c. Number of older adults aged 70 years & over in your household:

|  |
|--|
|  |
|  |
|  |

### HISTORY OF COVID-19 RELATED ILLNESS OR SYMPTOMS

**Have you had any COVID-19 related symptoms in the past year?**

- Yes, I had symptoms but I was not tested
- Yes, I had symptoms but my test(s) were all negative
- Yes, I had symptoms and I had at least one positive test
- Yes, I had symptoms, had a test, but it failed
- No
- I am not sure

If yes, when did your COVID-19 related symptoms start?   /   /

Approximate dates are fine. If you have had symptoms more than once, record the first date.

If yes, how long were you ill for? \_\_\_\_\_ days

If yes, were you admitted to hospital?  yes  no  not known

If you had a positive COVID-19 result, when was that positive sample taken?

/   /

Has anyone else in your household tested positive for COVID-19?

no  yes If yes, approximate number of people

In the last 14 days have you had any contact with a person with confirmed COVID-19?

no  yes If yes, date of exposure   /   /

### Post Vaccination Symptoms

Did you develop any symptoms after dose 1?  yes  no  not known

IF yes, for each of the symptoms listed below, please use the scale below to grade any symptoms for this dose

- 0 No symptoms
- 1 Mild – easily tolerated with no limitation on normal activity
- 2 Moderate – some limitation of daily activity
- 3 Severe – unable to perform normal daily activity
- 4 Emergency department or hospital admission required

| <b>DOSE 1 SYMPTOMS</b>            | Date symptom started | Scale (0-4) on worst day | How long did your symptoms last? (in days) |
|-----------------------------------|----------------------|--------------------------|--------------------------------------------|
| Fever                             |                      |                          |                                            |
| Chills                            |                      |                          |                                            |
| Headache                          |                      |                          |                                            |
| Generally unwell                  |                      |                          |                                            |
| Tiredness                         |                      |                          |                                            |
| Joint pain /aches                 |                      |                          |                                            |
| Nausea /Vomiting                  |                      |                          |                                            |
| <b>REACTION AT INJECTION SITE</b> |                      |                          |                                            |
| Pain                              |                      |                          |                                            |

|                  |  |  |  |
|------------------|--|--|--|
| Tenderness       |  |  |  |
| Itching          |  |  |  |
| Redness / Warmth |  |  |  |
| Other            |  |  |  |

Did you develop any symptoms after dose 2?  yes  no  not known

**IF yes, for each of the symptoms listed below, please use the scale below to grade any symptoms for this dose**

- 0 No symptoms
- 1 Mild – easily tolerated with no limitation on normal activity
- 2 Moderate – some limitation of daily activity
- 3 Severe – unable to perform normal daily activity
- 4 Emergency department or hospital admission required

| <b><u>DOSE 2 SYMPTOMS</u></b>     | Date symptom started | Scale (0-4) on worst day | How long did your symptoms last? (in days) |
|-----------------------------------|----------------------|--------------------------|--------------------------------------------|
| Fever                             |                      |                          |                                            |
| Chills                            |                      |                          |                                            |
| Headache                          |                      |                          |                                            |
| Generally unwell                  |                      |                          |                                            |
| Tiredness                         |                      |                          |                                            |
| Joint pain /aches                 |                      |                          |                                            |
| Nausea /Vomiting                  |                      |                          |                                            |
| <b>REACTION AT INJECTION SITE</b> |                      |                          |                                            |
| Pain                              |                      |                          |                                            |
| Tenderness                        |                      |                          |                                            |
| Itching                           |                      |                          |                                            |
| Redness / Warmth                  |                      |                          |                                            |
| Other                             |                      |                          |                                            |

**Thank you for taking the time to complete the questionnaire.**

## S2. Demographics by vaccination schedule

Table showing the demographics of participants included in the analysis by vaccination schedule

|                     | ChAd/ChAd        |      | ChAd/BNT         |      | BNT/ChAd         |      | BNT/BNT          |      |
|---------------------|------------------|------|------------------|------|------------------|------|------------------|------|
|                     | n                | %    | n                | %    | n                | %    | n                | %    |
| Sex                 |                  |      |                  |      |                  |      |                  |      |
| Male                | 179              | 38.8 | 131              | 22.9 | 58               | 34.7 | 32               | 28.3 |
| Female              | 282              | 61.2 | 437              | 76.4 | 108              | 64.7 | 81               | 71.7 |
| Non-binary          | -                | -    | 1                | 0.2  | -                | -    | -                | -    |
| Not known           | -                | -    | 2                | 0.3  | -                | -    | -                | -    |
| Age category        | Median age (IQR) |      | Median age (IQR) |      | Median age (IQR) |      | Median age (IQR) |      |
| Under 50            | 40 (32-45)       |      | 38 (32-45)       |      | 41 (35-46)       |      | 33 (29-42)       |      |
| 50 and over         | 54 (52-58)       |      | 59 (54-65)       |      | 63 (58-67)       |      | 59 (55-64)       |      |
| Ethnicity           | n                | %    | n                | %    | n                | %    | n                | %    |
| White               | 399              | 86.6 | 515              | 90   | 148              | 88.6 | 88               | 77.9 |
| Black               | 21               | 4.6  | 7                | 1.2  | 3                | 1.8  | 5                | 4.4  |
| Asian               | 28               | 6.1  | 24               | 4.2  | 10               | 6    | 15               | 13.3 |
| Mixed               | 9                | 2    | 17               | 3    | 3                | 2    | 3                | 2.7  |
| Other               | 1                | 0.2  | 6                | 1    | 3                | 1.8  | 1                | 0.9  |
| Unknown             | 3                | 0.7  | 3                | 0.5  | -                | -    | 1                | 0.9  |
| Previous infection  |                  |      |                  |      |                  |      |                  |      |
| Confirmed infection | 73               | 15.8 | 29               | 5    | 13               | 7.8  | 12               | 10.6 |
| Previous symptoms   | 101              | 21.9 | 153              | 26.7 | 29               | 17.4 | 17               | 15   |
| No prior infection  | 287              | 3    | 390              | 68.2 | 125              | 74.9 | 84               | 74.3 |
| Total               | 461              | 35.1 | 572              | 43.6 | 167              | 12.7 | 113              | 8.6  |

BNT: Comirnaty (BNT162b2, BioNTech-Pfizer, Mainz, Germany/New York, United States (US); ChAd: Vaxrevia (ChAdOx1/nCoV-19, AstraZeneca, Cambridge, United Kingdom (UK).

### S.3 Vaccination schedule by previous infection

Number of participants who reported local and systemic symptoms after prime and boost vaccines by vaccination schedule and previous infection

a) Those who reported no previous infection or symptoms of COVID-19

|                   | Prime                |                 |                     |                 |                     |                 |                   |                 | Boost                |                 |                     |                 |                     |                 |                   |                 |
|-------------------|----------------------|-----------------|---------------------|-----------------|---------------------|-----------------|-------------------|-----------------|----------------------|-----------------|---------------------|-----------------|---------------------|-----------------|-------------------|-----------------|
|                   | ChAd/ChAd<br>(n=287) |                 | ChAd/BNT<br>(n=390) |                 | BNT/ChAd<br>(n=125) |                 | BNT/BNT<br>(n=84) |                 | ChAd/ChAd<br>(n=287) |                 | ChAd/BNT<br>(n=390) |                 | BNT/ChAd<br>(n=125) |                 | BNT/BNT<br>(n=84) |                 |
|                   | n                    | % (95%CI)       | n                   | % (95%CI)       | n                   | % (95%CI)       | n                 | % (95%CI)       | n                    | % (95%CI)       | n                   | % (95%CI)       | n                   | % (95%CI)       | n                 | % (95%CI)       |
| <b>Systemic</b>   |                      |                 |                     |                 |                     |                 |                   |                 |                      |                 |                     |                 |                     |                 |                   |                 |
| Fever             | 104                  | 36.2(30.6-42.0) | 195                 | 50.0(45.1-55.2) | 16                  | 12.8(7.5-20.0)  | 6                 | 7.1(2.7-14.9)   | 17                   | 5.9(3.5-9.3)    | 52                  | 13.3(10.1-17.2) | 34                  | 27.2(19.6-35.9) | 6                 | 7.1(2.7-14.9)   |
| Chills            | 119                  | 41.5(35.7-47.4) | 197                 | 50.5(45.6-55.7) | 13                  | 10.4(5.70-17.1) | 6                 | 7.1(2.7-14.9)   | 24                   | 8.4(5.4-12.2)   | 72                  | 18.5(17.8-22.7) | 36                  | 28.8(21.1-37.6) | 7                 | 8.3(3.4-16.4)   |
| Headache          | 109                  | 38.0(32.3-43.9) | 237                 | 60.8(55.9-65.8) | 22                  | 17.6(11.4-25.4) | 12                | 14.3(7.6-23.6)  | 48                   | 16.7(12.6-21.6) | 119                 | 30.5(26.0-35.4) | 44                  | 35.2(26.9-44.2) | 12                | 14.3(7.6-23.6)  |
| Unwell            | 141                  | 49.1(43.2-55.1) | 259                 | 66.4(61.7-71.3) | 29                  | 23.2(16.1-31.6) | 13                | 15.5(8.5-25.0)  | 53                   | 18.5(14.1-23.4) | 119                 | 30.5(26.0-35.4) | 48                  | 38.4(29.8-47.5) | 15                | 17.9(10.4-27.7) |
| Tiredness         | 138                  | 48.1(42.2-54.0) | 254                 | 65.1(60.3-70.0) | 29                  | 23.2(16.1-31.6) | 15                | 17.9(10.4-27.7) | 60                   | 20.9(16.4-26.1) | 129                 | 33.1(28.5-38.1) | 47                  | 37.6(29.1-46.7) | 19                | 22.6(14.2-33.0) |
| Joint pain        | 105                  | 36.6(31.0-42.5) | 190                 | 48.7(43.8-53.9) | 20                  | 16.0(10.6-23.6) | 7                 | 8.3(3.4-16.4)   | 37                   | 12.9(9.2-17.3)  | 74                  | 19.0(15.2-23.3) | 36                  | 28.8(21.1-37.6) | 9                 | 10.7(5.0-19.4)  |
| Nausea            | 27                   | 9.4(6.3-13.4)   | 99                  | 25.4(21.2-30.1) | 12                  | 9.6(5.1-16.2)   | 1                 | 1.2(0.0-6.5)    | 5                    | 1.7(0.6-4.0)    | 34                  | 8.7(6.1-12.0)   | 10                  | 8.0(3.9-14.2)   | 1                 | 1.2(0.0-6.5)    |
| <b>Local</b>      |                      |                 |                     |                 |                     |                 |                   |                 |                      |                 |                     |                 |                     |                 |                   |                 |
| Pain              | 117                  | 40.8(35.0-46.7) | 199                 | 51.0(46.1-56.2) | 30                  | 24.0(16.8-32.5) | 21                | 25.0(16.2-35.6) | 57                   | 19.9(15.4-25.0) | 147                 | 37.7(33.0-42.8) | 40                  | 32.0(23.9-40.9) | 17                | 20.2(12.3-30.4) |
| Tenderness        | 113                  | 39.4(33.7-45.3) | 184                 | 47.1(42.2-52.4) | 27                  | 21.6(14.7-29.9) | 23                | 27.4(18.2-38.2) | 57                   | 19.9(15.4-25.0) | 149                 | 38.2(33.4-43.3) | 42                  | 33.6(25.4-42.6) | 20                | 23.8(15.2-34.3) |
| Itch              | 13                   | 4.5(2.4-7.6)    | 25                  | 6.4(4.2-9.3)    | 7                   | 5.6(2.3-11.2)   | 1                 | 1.2(0.0-6.5)    | 9                    | 3.1(1.4-5.90)   | 15                  | 3.9(2.2-6.2)    | 5                   | 4.0(1.3-9.1)    | 1                 | 1.2(0.0-6.5)    |
| Redness           | 35                   | 12.2(8.6-16.6)  | 71                  | 18.2(14.5-22.5) | 11                  | 8.8(4.5-15.2)   | 4                 | 4.8(1.3-11.7)   | 10                   | 3.5(1.7-6.3)    | 38                  | 9.7(7.0-13.2)   | 14                  | 11.2(6.3-18.1)  | 1                 | 1.2(0.0-6.5)    |
| <b>Total</b>      |                      |                 |                     |                 |                     |                 |                   |                 |                      |                 |                     |                 |                     |                 |                   |                 |
| Systemic          | 180                  | 62.7(56.8-68.3) | 300                 | 76.9(72.6-81.2) | 41                  | 32.8(24.7-41.8) | 21                | 25.0(16.2-35.6) | 82                   | 28.6(23.4-34.2) | 177                 | 45.4(40.5-50.6) | 62                  | 49.6(40.5-58.7) | 24                | 28.6(19.2-39.5) |
| Local             | 142                  | 49.5(43.6-55.4) | 277                 | 58.2(66.4-75.7) | 38                  | 30.4(22.5-39.3) | 25                | 29.8(20.3-40.7) | 73                   | 25.4(20.5-30.9) | 179                 | 45.9(41.0-51.1) | 49                  | 39.2(30.6-48.3) | 25                | 29.8(20.3-40.7) |
| Overall           | 183                  | 63.8(57.9-69.3) | 313                 | 80.5(76.2-84.3) | 53                  | 42.4(33.6-51.6) | 28                | 33.3(23.4-44.5) | 96                   | 33.5(28.0-39.2) | 212                 | 54.4(49.4-59.5) | 69                  | 55.2(46.1-64.1) | 28                | 33.3(23.4-44.5) |
| Medical attention | 19                   | 6.6(4.0-10.2)   | 127                 | 32.6(28.0-37.6) | 22                  | 17.6(11.4-25.4) | 4                 | 4.8(1.3-11.8)   | 8                    | 2.8(1.2-5.4)    | 28                  | 7.2(4.8-10.2)   | 19                  | 14.4(8.8-21.8)  | 5                 | 6.0(2.0-13.4)   |

b) Those who reported confirmed SARS-CoV-2 infection

|                   | Prime               |                 |                    |                 |                    |                 |                   |                 | Boost               |                 |                    |                 |                    |                   |                   |                 |
|-------------------|---------------------|-----------------|--------------------|-----------------|--------------------|-----------------|-------------------|-----------------|---------------------|-----------------|--------------------|-----------------|--------------------|-------------------|-------------------|-----------------|
|                   | ChAd/ChAd<br>(n=73) |                 | ChAd/BNT<br>(n=29) |                 | BNT/ChAd<br>(n=13) |                 | BNT/BNT<br>(n=12) |                 | ChAd/ChAd<br>(n=73) |                 | ChAd/BNT<br>(n=29) |                 | BNT/ChAd<br>(n=13) |                   | BNT/BNT<br>(n=12) |                 |
|                   | n                   | % (95%CI)       | n                  | % (95%CI)       | n                  | % (95%CI)       | n                 | % (95%CI)       | n                   | % (95%CI)       | n                  | % (95%CI)       | n                  | % (95%CI)         | n                 | % (95%CI)       |
| Systemic          |                     |                 |                    |                 |                    |                 |                   |                 |                     |                 |                    |                 |                    |                   |                   |                 |
| Fever             | 34                  | 46.6(34.8-58.6) | 17                 | 58.6(38.9-76.5) | 5                  | 38.5(13.9-68.4) | 4                 | 33.3(9.9-65.1)  | 3                   | 4.1(0.7-11.5)   | 8                  | 27.6(12.7-47.2) | 1                  | 7.7(0.2-36.0)     | 3                 | 25.0(5.5-57.2)  |
| Chills            | 34                  | 46.6(34.8-58.6) | 9                  | 31.0(15.3-50.8) | 4                  | 30.8(9.1-61.4)  | 4                 | 33.3(9.9-65.1)  | 3                   | 4.1(0.7-11.5)   | 6                  | 20.7(8.0-39.7)  | 2                  | 15.4(1.9-45.4)    | 2                 | 16.7(2.1-48.4)  |
| Headache          | 37                  | 50.7(38.7-62.6) | 17                 | 58.6(38.9-76.5) | 7                  | 53.9(25.1-80.8) | 7                 | 58.3(27.7-84.8) | 16                  | 21.9(13.1-33.1) | 13                 | 44.8(26.4-64.3) | 8                  | 61.5(31.6-86.1)   | 3                 | 25.0(5.5-57.2)  |
| Unwell            | 43                  | 58.9(46.8-70.3) | 20                 | 69.0(49.2-84.7) | 7                  | 53.9(25.1-80.8) | 8                 | 66.7(34.9-90.1) | 10                  | 13.7(6.7-23.8)  | 13                 | 44.8(26.4-64.3) | 5                  | 38.5(13.86-68.42) | 4                 | 33.3(9.9-65.1)  |
| Tiredness         | 43                  | 58.9(46.8-70.3) | 21                 | 72.4(52.8-87.8) | 7                  | 53.9(25.1-80.8) | 7                 | 58.3(27.7-84.8) | 14                  | 19.2(10.9-30.1) | 14                 | 48.3(29.4-67.5) | 7                  | 53.9(25.1-80.8)   | 5                 | 41.7(15.2-72.3) |
| Joint pain        | 32                  | 43.8(32.2-56.0) | 17                 | 58.6(38.9-76.5) | 4                  | 30.8(9.1-61.4)  | 4                 | 33.3(9.9-65.1)  | 6                   | 8.2(3.1-17.0)   | 9                  | 31.0(15.3-50.8) | 5                  | 38.5(13.9-68.4)   | 3                 | 25.0(5.5-57.2)  |
| Nausea            | 8                   | 11.0(4.9-20.5)  | 4                  | 13.8(3.9-31.7)  | 2                  | 15.4(1.9-45.4)  | 1                 | 8.3(0.2-38.5)   | 1                   | 1.4(0.0-7.4)    | 5                  | 17.2(5.8-35.8)  | 2                  | 15.4(1.9-45.4)    | 1                 | 8.3(0.2-38.5)   |
| Local             |                     |                 |                    |                 |                    |                 |                   |                 |                     |                 |                    |                 |                    |                   |                   |                 |
| Pain              | 38                  | 52.1(40.0-64.0) | 17                 | 58.6(38.9-76.5) | 7                  | 53.9(25.1-80.8) | 8                 | 66.7(34.9-90.1) | 8                   | 11.0(4.9-20.5)  | 10                 | 34.5(17.9-54.3) | 7                  | 53.9(25.1-80.8)   | 4                 | 33.3(9.9-65.1)  |
| Tenderness        | 37                  | 50.7(38.7-62.6) | 14                 | 48.3(29.4-67.5) | 5                  | 38.5(13.9-68.4) | 7                 | 58.3(27.7-84.8) | 7                   | 9.6(3.9-18.8)   | 14                 | 48.3(29.4-67.5) | 5                  | 38.5(13.9-68.4)   | 5                 | 41.7(15.2-72.3) |
| Itch              | 4                   | 5.5(1.5-13.4)   | 3                  | 10.3(21.9-27.4) | 3                  | 23.1(5.0-53.8)  | 1                 | 8.3(0.2-38.5)   | 1                   | 1.4(0.0-7.4)    | 3                  | 10.3(21.9-27.4) | 0                  | 0(0-24.7)         | 2                 | 16.7(2.1-48.4)  |
| Redness           | 16                  | 21.9(13.1-33.1) | 8                  | 27.6(12.7-47.2) | 3                  | 23.1(5.0-53.8)  | 4                 | 33.3(9.9-65.1)  | 7                   | 9.6(3.9-18.8)   | 8                  | 27.6(12.7-47.3) | 3                  | 23.1(5.0-53.8)    | 3                 | 25.0(5.5-57.2)  |
| Total             |                     |                 |                    |                 |                    |                 |                   |                 |                     |                 |                    |                 |                    |                   |                   |                 |
| Systemic          | 53                  | 72.6(60.9-82.4) | 23                 | 79.3(60.3-92.0) | 9                  | 69.2(38.6-90.9) | 8                 | 66.7(34.9-90.1) | 19                  | 26.0(16.5-37.6) | 17                 | 58.6(38.9-76.5) | 10                 | 76.9(46.2-95.0)   | 5                 | 41.7(15.2-72.3) |
| Local             | 47                  | 64.4(52.3-75.3) | 17                 | 58.6(38.9-76.5) | 9                  | 69.2(38.6-90.9) | 8                 | 66.7(34.9-90.1) | 12                  | 16.4(8.8-27.0)  | 15                 | 51.7(32.5-70.6) | 7                  | 53.9(25.1-80.8)   | 5                 | 41.7(15.2-72.3) |
| Overall           | 53                  | 72.6(60.9-82.4) | 23                 | 79.3(60.3-92.0) | 9                  | 69.2(38.6-90.9) | 9                 | 75.0(42.8-94.5) | 19                  | 26.0(16.5-37.6) | 18                 | 62.1(42.3-79.3) | 10                 | 76.9(46.2-95.0)   | 5                 | 41.7(15.2-72.3) |
| Medical attention | 10                  | 13.7(6.8-23.8)  | 9                  | 31.0(15.3-50.8) | 6                  | 46.2(19.2-74.9) | 1                 | 8.3(0.2-38.5)   | 2                   | 2.7(0.3-9.6)    | 3                  | 10.3(2.2-27.4)  | 3                  | 23.1(5.0-53.8)    | 1                 | 8.3(0.2-38.5)   |

c) Those who reported symptoms of COVID-19 but no confirmatory test

|                   | Prime                |                 |                     |                 |                    |                 |                   |                 | Boost     |                 |          |                 |          |                  |         |                 |
|-------------------|----------------------|-----------------|---------------------|-----------------|--------------------|-----------------|-------------------|-----------------|-----------|-----------------|----------|-----------------|----------|------------------|---------|-----------------|
|                   | ChAd/ChAd<br>(n=101) |                 | ChAd/BNT<br>(n=153) |                 | BNT/ChAd<br>(n=29) |                 | BNT/BNT<br>(n=17) |                 | ChAd/ChAd |                 | ChAd/BNT |                 | BNT/ChAd |                  | BNT/BNT |                 |
|                   | n                    | % (95%CI)       | n                   | % (95%CI)       | n                  | % (95%CI)       | n                 | % (95%CI)       | n         | % (95%CI)       | n        | % (95%CI)       | n        | % (95%CI)        | n       | % (95%CI)       |
| <b>Systemic</b>   |                      |                 |                     |                 |                    |                 |                   |                 |           |                 |          |                 |          |                  |         |                 |
| Fever             | 50                   | 49.5(39.4-59.6) | 104                 | 68.0(60.0-75.3) | 9                  | 31.0(15.3-50.8) | 3                 | 17.7(3.8-43.4)  | 9         | 8.9(4.2-16.3)   | 33       | 21.6(15.3-28.9) | 11       | 37.9(20.68-57.7) | 3       | 17.7(3.8-43.4)  |
| Chills            | 43                   | 42.6(32.8-52.8) | 90                  | 58.8(50.6-66.7) | 4                  | 13.8(3.9-31.7)  | 5                 | 29.4(10.3-56.0) | 13        | 12.9(7.0-21.0)  | 30       | 19.6(13.6-26.8) | 8        | 27.6(12.7-47.2)  | 3       | 17.7(3.8-43.4)  |
| Headache          | 54                   | 53.5(43.3-63.5) | 116                 | 75.8(68.2-82.4) | 8                  | 27.6(12.7-47.2) | 5                 | 29.4(10.3-56.0) | 29        | 28.7(20.1-38.6) | 63       | 41.2(33.3-49.4) | 18       | 62.1(42.3-79.3)  | 3       | 17.7(3.8-43.4)  |
| Unwell            | 60                   | 59.4(49.2-69.1) | 126                 | 82.4(75.4-88.0) | 13                 | 44.8(26.4-64.3) | 7                 | 41.2(18.4-67.1) | 21        | 20.8(13.4-30.0) | 67       | 43.8(35.8-52.0) | 17       | 58.6(38.9-76.5)  | 3       | 17.7(3.8-43.4)  |
| Tiredness         | 60                   | 59.4(49.2-69.1) | 128                 | 83.7(76.8-89.1) | 11                 | 37.9(20.7-57.7) | 6                 | 35.3(14.2-61.7) | 32        | 31.7(22.8-41.7) | 78       | 51.0(42.8-59.1) | 18       | 62.1(42.3-79.3)  | 2       | 11.8(1.5-36.4)  |
| Joint pain        | 47                   | 46.5(36.6-56.7) | 91                  | 59.5(51.3-67.3) | 3                  | 10.3(2.2-27.4)  | 6                 | 35.3(14.2-61.7) | 16        | 15.8(9.3-24.5)  | 47       | 30.7(23.5-38.7) | 9        | 31.0(15.3-50.8)  | 1       | 5.9(0.2-28.7)   |
| Nausea            | 14                   | 13.9(7.8-22.2)  | 50                  | 32.7(25.3-40.7) | 6                  | 20.7(8.0-39.7)  | 2                 | 11.8(1.5-36.4)  | 8         | 7.9(3.5-15.0)   | 19       | 12.4(7.6-18.7)  | 9        | 31.0(15.3-50.8)  | 1       | 5.9(0.2-28.7)   |
| <b>Local</b>      |                      |                 |                     |                 |                    |                 |                   |                 |           |                 |          |                 |          |                  |         |                 |
| Pain              | 48                   | 47.5(37.5-57.7) | 90                  | 58.8(50.6-66.7) | 12                 | 41.4(23.5-61.1) | 6                 | 35.3(14.2-61.7) | 23        | 22.8(15.0-32.2) | 78       | 51.0(42.8-59.1) | 17       | 58.6(38.9-76.5)  | 3       | 17.7(3.8-43.4)  |
| Tenderness        | 47                   | 46.5(36.6-56.7) | 94                  | 61.4(53.2-69.2) | 12                 | 41.4(23.5-61.1) | 7                 | 41.2(18.4-67.1) | 25        | 24.8(16.7-34.3) | 90       | 58.8(50.6-66.7) | 18       | 62.1(42.3-79.3)  | 3       | 17.7(3.8-43.4)  |
| Itch              | 10                   | 9.9(4.9-17.5)   | 13                  | 8.5(4.6-14.1)   | 3                  | 10.3(2.2-27.4)  | 1                 | 5.9(0.2-28.7)   | 4         | 4.0(1.1-9.8)    | 7        | 4.6(1.9-9.2)    | 2        | 6.9(0.9-22.8)    | 0       | 0(0-19.5)       |
| Redness           | 16                   | 16.0(9.3-24.5)  | 38                  | 24.8(18.2-32.5) | 5                  | 17.2(5.8-35.8)  | 2                 | 11.8(1.5-36.4)  | 6         | 5.9(2.2-12.5)   | 25       | 16.3(10.9-23.8) | 4        | 13.8(3.9-31.7)   | 1       | 5.9(0.2-28.7)   |
| <b>Total</b>      |                      |                 |                     |                 |                    |                 |                   |                 |           |                 |          |                 |          |                  |         |                 |
| Systemic          | 70                   | 69.3(59.3-78.1) | 137                 | 89.5(83.6-93.9) | 16                 | 55.2(35.7-73.6) | 9                 | 52.9(27.8-77.0) | 46        | 45.5(35.6-55.8) | 98       | 64.1(55.9-71.6) | 19       | 65.5(45.7-82.1)  | 6       | 35.3(14.2-61.7) |
| Local             | 57                   | 56.4(46.2-66.3) | 105                 | 68.6(60.6-75.9) | 14                 | 48.3(29.5-67.5) | 9                 | 52.9(27.8-77.0) | 34        | 33.7(24.6-43.8) | 103      | 67.3(59.3-74.7) | 18       | 62.1(42.3-79.3)  | 4       | 23.5(6.8-49.9)  |
| Overall           | 71                   | 70.3(60.4-79.0) | 138                 | 90.8(84.3-94.4) | 18                 | 62.1(42.3-79.3) | 9                 | 52.9(27.8-77.0) | 47        | 47.0(36.6-56.7) | 116      | 75.8(68.7-82.8) | 19       | 65.5(45.7-82.1)  | 6       | 35.3(14.2-61.7) |
| Medical attention | 5                    | 5.0(1.6-11.2)   | 52                  | 34.0(26.5-42.1) | 7                  | 24.1(10.2-43.5) | 3                 | 17.7(3.8-43.4)  | 3         | 3.0(6.2-8.4)    | 24       | 15.7(10.3-24.4) | 10       | 34.5(17.9-54.3)  | 1       | 5.9(0.2-28.7)   |

BNT: Comirnaty (BNT162b2, BioNTech-Pfizer, Mainz, Germany/New York, United States (US); ChAd: Vaxzevria (ChAdOx1/nCoV-19, AstraZeneca, Cambridge, United Kingdom (UK).

Please note individuals could report more than one reaction therefore totals do not match the sum of the symptoms.



#### S.4 Vaccination schedule by age group

Number of participants who reported local and systemic symptoms after prime and boost vaccines by vaccination group and age and who did not report previous symptoms of COVID-19 nor confirmed infection

a) Those aged under 50

|                   | Prime               |                 |                     |                 |                    |                 |                   |                 | Boost               |                 |                     |                 |                    |                 |                   |                 |
|-------------------|---------------------|-----------------|---------------------|-----------------|--------------------|-----------------|-------------------|-----------------|---------------------|-----------------|---------------------|-----------------|--------------------|-----------------|-------------------|-----------------|
|                   | ChAd/ChAd<br>(n=85) |                 | ChAd/BNT<br>(n=189) |                 | BNT/ChAd<br>(n=38) |                 | BNT/BNT<br>(n=37) |                 | ChAd/ChAd<br>(n=85) |                 | ChAd/BNT<br>(n=189) |                 | BNT/ChAd<br>(n=38) |                 | BNT/BNT<br>(n=37) |                 |
|                   | n                   | % (95%CI)       | n                   | % (95%CI)       | n                  | % (95%CI)       | n                 | % (95%CI)       | n                   | % (95%CI)       | n                   | % (95%CI)       | n                  | % (95%CI)       | n                 | % (95%CI)       |
| <b>Systemic</b>   |                     |                 |                     |                 |                    |                 |                   |                 |                     |                 |                     |                 |                    |                 |                   |                 |
| Fever             | 43                  | 50.6(39.5-61.6) | 109                 | 57.7(50.3-64.9) | 5                  | 13.1(4.4-28.1)  | 5                 | 13.5(4.5-28.8)  | 10                  | 11.8(5.9-20.6)  | 26                  | 13.8(9.2-19.5)  | 17                 | 44.7(28.2-61.7) | 5                 | 13.5(4.5-28.8)  |
| Chills            | 46                  | 54.1(43.0-65.0) | 110                 | 58.2(50.8-65.3) | 5                  | 13.1(4.4-28.1)  | 4                 | 10.8(3.0-25.4)  | 10                  | 11.8(5.9-20.6)  | 33                  | 17.5(12.3-23.6) | 17                 | 44.7(28.2-61.7) | 4                 | 10.8(3.0-25.4)  |
| Headache          | 42                  | 49.4(38.4-60.5) | 120                 | 63.5(56.2-70.4) | 7                  | 18.4(7.7-34.3)  | 7                 | 18.9(8.0-35.2)  | 19                  | 22.4(14.0-32.7) | 65                  | 34.4(27.7-41.6) | 17                 | 44.7(28.2-61.7) | 9                 | 24.3(11.8-41.2) |
| Unwell            | 49                  | 57.7(46.4-68.3) | 138                 | 73.0(66.1-79.2) | 7                  | 18.4(7.7-34.3)  | 6                 | 16.2(6.1-32.0)  | 19                  | 22.4(14.0-32.7) | 65                  | 34.4(27.7-41.6) | 23                 | 60.5(43.4-76.0) | 9                 | 24.3(11.8-41.2) |
| Tiredness         | 49                  | 57.7(46.4-68.3) | 134                 | 70.9(63.9-77.3) | 9                  | 23.7(11.4-40.2) | 11                | 29.7(15.9-47.0) | 20                  | 23.5(15.0-34.0) | 73                  | 38.6(31.7-46.0) | 20                 | 52.6(35.8-69.0) | 10                | 27.0(13.8-44.1) |
| Joint pain        | 36                  | 42.4(31.7-53.6) | 103                 | 54.5(47.1-61.7) | 5                  | 13.1(4.4-28.1)  | 4                 | 10.8(3.0-25.4)  | 13                  | 15.3(8.4-24.7)  | 41                  | 21.7(16.0-28.3) | 15                 | 39.5(24.0-56.6) | 5                 | 13.5(4.5-28.8)  |
| Nausea            | 12                  | 14.1(7.5-23.4)  | 55                  | 29.1(22.7-36.1) | 5                  | 13.1(4.4-28.1)  | 0                 | 0(0-9.5)        | 1                   | 1.2(0.0-6.4)    | 14                  | 7.4(4.1-12.1)   | 6                  | 16.0(6.0-31.3)  | 1                 | 2.7(0.1-14.2)   |
| <b>Local</b>      |                     |                 |                     |                 |                    |                 |                   |                 |                     |                 |                     |                 |                    |                 |                   |                 |
| Pain              | 44                  | 51.8(40.7-62.7) | 108                 | 57.1(49.8-64.3) | 8                  | 21.1(9.6-37.3)  | 13                | 35.1(20.2-52.5) | 21                  | 24.7(16.0-35.3) | 74                  | 39.2(32.2-46.5) | 19                 | 50.0(33.4-66.6) | 7                 | 18.9(8.0-35.2)  |
| Tenderness        | 41                  | 48.2(37.3-59.3) | 94                  | 49.7(42.4-57.1) | 8                  | 21.1(9.6-37.3)  | 13                | 35.1(20.2-52.5) | 19                  | 22.4(14.0-32.7) | 74                  | 39.2(32.2-46.5) | 17                 | 44.7(28.2-61.7) | 10                | 27.0(13.8-44.1) |
| Itch              | 7                   | 8.2(3.4-16.2)   | 14                  | 7.4(4.1-12.1)   | 3                  | 7.9(16.6-21.4)  | 0                 | 0(0-9.5)        | 1                   | 1.2(0.0-6.4)    | 9                   | 4.8(2.2-8.8)    | 3                  | 7.9(16.6-21.4)  | 0                 | 0(0-9.5)        |
| Redness           | 19                  | 22.4(14.0-32.7) | 38                  | 20.1(14.6-29.5) | 5                  | 13.1(4.4-28.1)  | 1                 | 2.7(0.06-14.16) | 3                   | 1.2(0.0-6.4)    | 13                  | 6.9(3.7-11.5)   | 5                  | 13.2(4.4-28.1)  | 0                 | 0(0-9.5)        |
| <b>Total</b>      |                     |                 |                     |                 |                    |                 |                   |                 |                     |                 |                     |                 |                    |                 |                   |                 |
| Systemic          | 63                  | 74.1(63.5-83.0) | 153                 | 82.0(74.6-86.3) | 10                 | 26.3(13.4-43.1) | 13                | 35.1(20.2-52.5) | 28                  | 32.9(23.1-44.0) | 92                  | 48.7(41.4-56.0) | 25                 | 65.8(48.7-80.4) | 13                | 35.1(20.2-52.5) |
| Local             | 52                  | 61.2(50.0-71.6) | 120                 | 63.5(56.2-70.4) | 9                  | 23.8(11.4-40.2) | 15                | 40.5(24.7-57.9) | 26                  | 30.6(21.0-41.5) | 91                  | 48.2(40.8-55.5) | 21                 | 55.3(38.3-71.4) | 12                | 32.4(18.0-49.8) |
| Overall           | 63                  | 74.1(63.5-83.0) | 156                 | 82.5(76.4-87.7) | 14                 | 36.8(21.8-54.0) | 16                | 43.2(27.1-60.5) | 32                  | 37.7(27.4-48.8) | 108                 | 57.1(49.8-64.3) | 29                 | 76.3(59.8-88.6) | 14                | 37.8(22.5-55.2) |
| Medical attention | 7                   | 8.2(3.4-16.2)   | 60                  | 31.8(25.2-38.9) | 9                  | 23.8(11.4-40.2) | 2                 | 5.4(0.7-18.2)   | 4                   | 4.7(1.3-11.6)   | 11                  | 5.8(2.9-10.2)   | 10                 | 26.3(13.4-43.1) | 1                 | 2.7(0.1-14.2)   |

b) Those aged 50 and over

|                   | Prime                |                 |                     |                  |                    |                 |                   |                 | Boost                |                 |                     |                 |                    |                 |                   |                 |
|-------------------|----------------------|-----------------|---------------------|------------------|--------------------|-----------------|-------------------|-----------------|----------------------|-----------------|---------------------|-----------------|--------------------|-----------------|-------------------|-----------------|
|                   | ChAd/ChAd<br>(n=202) |                 | ChAd/BNT<br>(n=201) |                  | BNT/ChAd<br>(n=87) |                 | BNT/BNT<br>(n=47) |                 | ChAd/ChAd<br>(n=202) |                 | ChAd/BNT<br>(n=201) |                 | BNT/ChAd<br>(n=87) |                 | BNT/BNT<br>(n=47) |                 |
|                   | n                    | % (95%CI)       | n                   | % (95%CI)        | n                  | % (95%CI)       | n                 | % (95%CI)       | n                    | % (95%CI)       | n                   | % (95%CI)       | n                  | % (95%CI)       | n                 | % (95%CI)       |
| <b>Systemic</b>   |                      |                 |                     |                  |                    |                 |                   |                 |                      |                 |                     |                 |                    |                 |                   |                 |
| Fever             | 61                   | 30.2(24.0-37.0) | 86                  | 42.8(35.8-49.9)  | 11                 | 12.6(6.5-21.5)  | 1                 | 2.1(0.1-11.3)   | 7                    | 3.5(1.4-7.0)    | 26                  | 12.9(8.6-18.4)  | 17                 | 19.5(11.8-29.4) | 1                 | 2.1(0.1-11.3)   |
| Chills            | 73                   | 36.0(29.5-43.2) | 87                  | 43.3(36.3-50.4)  | 8                  | 9.2(4.1-17.3)   | 2                 | 4.3(0.5-14.5)   | 14                   | 6.9(3.8-11.4)   | 39                  | 19.4(14.2-25.6) | 19                 | 21.8(13.7-32.0) | 3                 | 6.4(1.3-17.5)   |
| Headache          | 67                   | 33.2(26.7-40.1) | 117                 | 58.2(51.1-65.1)  | 15                 | 17.2(10.0-26.8) | 5                 | 10.6(3.5-23.1)  | 29                   | 14.4(9.8-20.0)  | 54                  | 26.9(20.9-33.6) | 27                 | 31.0(21.5-41.9) | 3                 | 6.4(1.3-17.5)   |
| Unwell            | 92                   | 45.5(38.5-52.7) | 121                 | 60.2(53.1-67.0)  | 22                 | 25.3(16.6-35.7) | 7                 | 14.9(6.2-28.3)  | 34                   | 18.8(12.0-22.7) | 54                  | 26.9(20.9-33.6) | 25                 | 28.7(19.5-39.4) | 6                 | 12.8(4.8-25.7)  |
| Tiredness         | 89                   | 44.1(37.1-51.2) | 120                 | 59.7(52.6-66.5)  | 20                 | 23.0(14.6-33.2) | 4                 | 8.5(2.4-20.4)   | 40                   | 19.8(14.5-26.0) | 56                  | 27.9(21.8-34.6) | 27                 | 31.0(21.5-41.9) | 9                 | 19.6(9.1-33.3)  |
| Joint pain        | 69                   | 34.2(27.7-41.1) | 87                  | 43.28(36.3-50.4) | 15                 | 17.2(10.0-26.8) | 3                 | 6.4(1.3-17.5)   | 24                   | 11.9(7.8-17.2)  | 33                  | 16.4(11.6-22.3) | 21                 | 24.1(15.6-34.5) | 4                 | 8.5(2.4-20.4)   |
| Nausea            | 15                   | 7.4(4.2-12.0)   | 44                  | 21.9(16.3-28.3)  | 7                  | 8.1(3.3-15.9)   | 1                 | 2.1(0.1-11.3)   | 4                    | 2.0(0.5-5.0)    | 20                  | 10.0(6.2-15.0)  | 4                  | 4.6(1.3-11.4)   | 0                 | 0(0-0.8)        |
| <b>Local</b>      |                      |                 |                     |                  |                    |                 |                   |                 |                      |                 |                     |                 |                    |                 |                   |                 |
| Pain              | 73                   | 36.1(29.5-43.2) | 91                  | 45.3(38.3-52.30) | 22                 | 25.3(16.6-35.7) | 8                 | 17.0(7.7-30.8)  | 36                   | 17.8(12.8-23.8) | 73                  | 36.3(29.7-43.4) | 21                 | 24.1(15.6-34.5) | 10                | 21.3(10.7-35.7) |
| Tenderness        | 72                   | 35.6(29.0-42.7) | 90                  | 44.9(37.8-51.9)  | 19                 | 21.8(13.7-32.0) | 10                | 21.3(10.7-35.7) | 38                   | 18.8(13.6-24.9) | 75                  | 37.3(30.6-44.4) | 25                 | 28.7(19.5-39.4) | 10                | 21.3(10.7-35.7) |
| Itch              | 6                    | 3.0(1.1-6.4)    | 11                  | 5.5(2.8-9.6)     | 4                  | 4.6(1.3-11.4)   | 1                 | 2.1(0.1-11.3)   | 8                    | 4.0(1.7-7.7)    | 6                   | 3.0(1.1-6.4)    | 2                  | 2.3(0.3-8.6)    | 1                 | 2.1(0.1-11.3)   |
| Redness           | 16                   | 7.9(4.6-14.8)   | 33                  | 16.4(11.6-22.3)  | 6                  | 6.9(2.6-14.4)   | 3                 | 6.4(1.3-17.5)   | 7                    | 3.5(1.4-7.0)    | 25                  | 12.4(8.2-17.8)  | 9                  | 10.3(4.8-18.7)  | 1                 | 2.1(0.1-11.3)   |
| <b>Total</b>      |                      |                 |                     |                  |                    |                 |                   |                 |                      |                 |                     |                 |                    |                 |                   |                 |
| Systemic          | 117                  | 57.9(50.8-64.8) | 147                 | 73.1(66.4-79.1)  | 31                 | 35.6(35.6-46.6) | 8                 | 17.0(7.7-30.8)  | 54                   | 26.7(20.8-33.4) | 85                  | 42.3(35.4-49.4) | 37                 | 42.5(32.0-53.6) | 11                | 23.4(12.3-38.0) |
| Local             | 90                   | 44.6(37.6-51.6) | 107                 | 53.2(46.1-60.3)  | 29                 | 33.3(23.6-44.3) | 10                | 21.3(10.7-35.7) | 47                   | 23.3(17.6-29.7) | 88                  | 43.8(36.8-50.9) | 28                 | 32.2(22.6-43.1) | 13                | 27.7(15.6-42.6) |
| Overall           | 120                  | 59.4(43.4-57.6) | 157                 | 78.5(71.8-83.6)  | 39                 | 44.8(31.6-55.9) | 12                | 25.1(13.9-40.4) | 64                   | 31.7(25.3-38.6) | 104                 | 51.7(44.6-58.8) | 40                 | 46.0(35.2-57.0) | 14                | 29.8(17.3-44.9) |
| Medical attention | 12                   | 5.9(3.1-10.6)   | 67                  | 33.3(26.9-40.3)  | 13                 | 14.9(8.2-24.2)  | 2                 | 4.3(0.5-14.5)   | 4                    | 2.0(0.5-5.0)    | 17                  | 8.5(5.0-13.2)   | 9                  | 9.2(4.1-17.3)   | 4                 | 8.5(2.4-20.4)   |

BNT: Comirnaty (BNT162b2, BioNTech-Pfizer, Mainz, Germany/New York, United States (US); ChAd: Vaxzevria (ChAdOx1/nCoV-19, AstraZeneca, Cambridge, United Kingdom (UK).

Please note individuals could report more than one reaction therefore totals do not match the sum of the symptoms.

## S.5 Vaccination schedule by sex

Number of participants who reported local and systemic symptoms after prime and boost vaccines by vaccination group and sex and who did not report previous symptoms of COVID-19 nor confirmed infection

### a) Women

|                   | Prime                |                 |                     |                 |                    |                 |                   |                 | Boost                |                 |                     |                 |                    |                 |                   |                 |
|-------------------|----------------------|-----------------|---------------------|-----------------|--------------------|-----------------|-------------------|-----------------|----------------------|-----------------|---------------------|-----------------|--------------------|-----------------|-------------------|-----------------|
|                   | ChAd/ChAd<br>(n=176) |                 | ChAd/BNT<br>(n=296) |                 | BNT/ChAd<br>(n=76) |                 | BNT/BNT<br>(n=58) |                 | ChAd/ChAd<br>(n=176) |                 | ChAd/BNT<br>(n=296) |                 | BNT/ChAd<br>(n=76) |                 | BNT/BNT<br>(n=58) |                 |
|                   | n                    | % (95%CI)       | n                   | % (95%CI)       | n                  | % (95%CI)       | n                 | % (95%CI)       | n                    | % (95%CI)       | n                   | % (95%CI)       | n                  | % (95%CI)       | n                 | % (95%CI)       |
| <b>Systemic</b>   |                      |                 |                     |                 |                    |                 |                   |                 |                      |                 |                     |                 |                    |                 |                   |                 |
| Fever             | 67                   | 38.1(30.9-45.7) | 161                 | 54.4(48.5-60.2) | 15                 | 19.7(11.5-30.5) | 6                 | 10.3(3.9-21.2)  | 14                   | 8.0(4.4-13.0)   | 42                  | 14.2(10.4-18.7) | 24                 | 31.6(21.4-43.3) | 4                 | 6.9(1.9-16.3)   |
| Chills            | 79                   | 44.9(37.4-52.6) | 168                 | 56.8(50.9-62.5) | 13                 | 17.1(9.4-27.5)  | 3                 | 5.2(1.1-14.4)   | 19                   | 10.8(6.6-16.3)  | 63                  | 21.3(16.8-26.4) | 26                 | 34.2(23.7-46.0) | 4                 | 6.9(1.9-16.3)   |
| Headache          | 77                   | 43.8(36.3-51.4) | 201                 | 67.9(62.3-73.2) | 20                 | 26.3(16.9-37.7) | 12                | 20.7(11.2-33.4) | 39                   | 22.2(16.3-29.0) | 98                  | 33.1(27.8-38.8) | 34                 | 44.7(33.3-56.6) | 12                | 20.7(11.2-33.4) |
| Unwell            | 93                   | 52.8(45.2-60.4) | 214                 | 72.3(6.8-73.3)  | 24                 | 31.6(21.4-43.3) | 10                | 17.2(8.6-29.4)  | 41                   | 23.3(17.3-30.2) | 97                  | 32.8(27.5-38.4) | 35                 | 46.1(34.6-58.9) | 11                | 19.0(10.0-31.4) |
| Tiredness         | 97                   | 55.1(47.4-62.6) | 211                 | 71.3(65.8-76.4) | 24                 | 31.6(21.4-43.3) | 14                | 24.1(13.9-37.2) | 48                   | 27.3(20.8-34.5) | 106                 | 35.8(27.5-38.4) | 36                 | 47.4(35.8-59.2) | 15                | 25.9(15.3-39.0) |
| Joint pain        | 78                   | 44.3(36.9-52.0) | 163                 | 55.1(49.2-60.8) | 18                 | 23.7(14.7-34.8) | 7                 | 12.1(5.0-23.3)  | 31                   | 17.6(12.3-24.1) | 64                  | 21.6(17.1-26.8) | 27                 | 35.5(24.9-47.3) | 7                 | 12.1(5.0-23.3)  |
| Nausea            | 22                   | 12.5(8.0-18.3)  | 85                  | 28.7(23.6-34.2) | 11                 | 14.5(7.5-24.4)  | 1                 | 1.7(0.0-9.2)    | 5                    | 2.8(9.3-6.5)    | 31                  | 10.5(7.2-14.5)  | 9                  | 11.8(5.6-21.3)  | 1                 | 1.7(0.0-9.2)    |
| <b>Local</b>      |                      |                 |                     |                 |                    |                 |                   |                 |                      |                 |                     |                 |                    |                 |                   |                 |
| Pain              | 84                   | 47.7(40.2-55.4) | 167                 | 56.4(50.6-62.1) | 24                 | 31.6(21.4-43.3) | 18                | 31.0(19.5-44.5) | 38                   | 21.6(15.8-28.4) | 120                 | 40.5(34.9-46.4) | 30                 | 39.5(28.4-51.4) | 12                | 20.7(11.2-33.4) |
| Tenderness        | 87                   | 49.4(41.8-57.1) | 159                 | 53.7(47.9-59.5) | 24                 | 31.6(21.4-43.3) | 20                | 34.5(22.5-48.1) | 46                   | 26.1(19.8-33.3) | 131                 | 44.3(38.5-50.1) | 32                 | 42.1(30.9-54.0) | 17                | 29.3(18.1-42.7) |
| Itch              | 12                   | 6.8(3.6-11.6)   | 24                  | 8.1(5.3-11.8)   | 6                  | 7.9(3.0-16.4)   | 1                 | 1.7(0.0-9.2)    | 9                    | 5.1(2.4-9.5)    | 12                  | 4.1(2.1-7.0)    | 4                  | 5.3(1.5-12.9)   | 1                 | 1.7(0.0-9.2)    |
| Redness           | 29                   | 16.5(11.3-22.8) | 64                  | 21.6(17.1-27.8) | 10                 | 13.2(6.5-22.9)  | 4                 | 6.9(1.9-16.3)   | 8                    | 4.6(2.0-8.6)    | 34                  | 11.5(8.1-15.7)  | 12                 | 15.8(8.4-26.0)  | 1                 | 1.7(0.0-9.2)    |
| <b>Total</b>      |                      |                 |                     |                 |                    |                 |                   |                 |                      |                 |                     |                 |                    |                 |                   |                 |
| Systemic          | 118                  | 67.1(60.0-73.9) | 249                 | 84.1(79.5-88.1) | 33                 | 43.4(32.1-55.3) | 17                | 29.3(18.1-42.7) | 64                   | 36.4(29.3-43.9) | 146                 | 49.3(43.5-55.2) | 44                 | 57.9(46.0-69.1) | 19                | 32.8(21.0-46.3) |
| Local             | 102                  | 58.0(50.2-65.3) | 89                  | 63.9(58.1-69.3) | 31                 | 40.8(29.6-52.7) | 21                | 36.2(24.0-50.0) | 53                   | 30.1(23.4-37.5) | 149                 | 50.3(44.5-56.2) | 36                 | 47.4(35.8-59.2) | 19                | 32.8(21.0-46.3) |
| Overall           | 121                  | 68.8(61.3-75.5) | 252                 | 85.4(80.6-89.0) | 42                 | 55.3(43.4-66.7) | 23                | 39.7(27.0-53.4) | 68                   | 38.6(31.4-46.3) | 176                 | 59.5(56.6-65.1) | 48                 | 63.2(51.3-73.9) | 21                | 36.2(24.0-50.0) |
| Medical attention | 15                   | 8.5(4.9-12.7)   | 103                 | 34.8(29.4-40.5) | 17                 | 22.4(13.6-33.4) | 3                 | 5.2(1.1-14.4)   | 6                    | 3.4(1.3-7.3)    | 25                  | 8.5(5.5-12.2)   | 11                 | 14.5(7.5-24.4)  | 3                 | 5.2(1.1-14.4)   |

b) Men

|                   | Prime                |                 |                    |                 |                    |                 |                   |                | Boost                |                 |                    |                 |                    |                 |                   |                 |
|-------------------|----------------------|-----------------|--------------------|-----------------|--------------------|-----------------|-------------------|----------------|----------------------|-----------------|--------------------|-----------------|--------------------|-----------------|-------------------|-----------------|
|                   | ChAd/ChAd<br>(n=111) |                 | ChAd/BNT<br>(n=93) |                 | BNT/ChAd<br>(n=49) |                 | BNT/BNT<br>(n=26) |                | ChAd/ChAd<br>(n=111) |                 | ChAd/BNT<br>(n=93) |                 | BNT/ChAd<br>(n=49) |                 | BNT/BNT<br>(n=26) |                 |
|                   | n                    | % (95%CI)       | n                  | % (95%CI)       | n                  | % (95%CI)       | n                 | % (95%CI)      | n                    | % (95%CI)       | n                  | % (95%CI)       | n                  | % (95%CI)       | n                 | % (95%CI)       |
| <b>Systemic</b>   |                      |                 |                    |                 |                    |                 |                   |                |                      |                 |                    |                 |                    |                 |                   |                 |
| Fever             | 37                   | 33.3(24.7-42.9) | 34                 | 36.5(26.8-47.2) | 1                  | 2.0(0.1-10.9)   | 0                 | 0(0-13.2)      | 3                    | 2.7(0.6-7.7)    | 10                 | 10.8(5.3-18.9)  | 10                 | 20.4(10.2-34.3) | 2                 | 7.7(0.9-25.1)   |
| Chills            | 40                   | 36.0(27.1-45.7) | 28                 | 30.1(21.0-40.5) | 0                  | 0.0(0-7.3)      | 3                 | 11.5(2.4-30.2) | 5                    | 4.5(1.5-10.2)   | 9                  | 9.7(4.5-17.6)   | 10                 | 20.4(10.2-34.3) | 3                 | 11.5(2.4-30.2)  |
| Headache          | 32                   | 28.8(20.6-38.2) | 35                 | 37.6(27.8-48.3) | 2                  | 4.1(5.0-14.0)   | 0                 | 0(0-13.2)      | 9                    | 8.1(3.8-14.8)   | 20                 | 21.5(13.7-31.2) | 10                 | 20.4(10.2-34.3) | 0                 | 0(0-13.2)       |
| Unwell            | 48                   | 43.2(33.9-53.0) | 44                 | 47.3(36.9-57.9) | 5                  | 10.2(3.4-22.2)  | 3                 | 11.5(2.4-30.2) | 12                   | 10.8(5.7-18.1)  | 21                 | 22.6(14.6-32.4) | 13                 | 26.5(15.0-41.1) | 4                 | 15.4(4.4-34.9)  |
| Tiredness         | 41                   | 36.9(28.0-46.6) | 42                 | 45.2(34.8-55.8) | 5                  | 10.2(3.4-22.2)  | 1                 | 3.9(0.1-19.6)  | 12                   | 10.8(5.7-18.1)  | 22                 | 23.7(15.5-33.6) | 11                 | 22.5(11.8-36.6) | 4                 | 15.4(4.4-34.9)  |
| Joint pain        | 27                   | 24.3(16.7-33.4) | 27                 | 29.0(20.1-39.4) | 2                  | 4.1(5.0-14.0)   | 0                 | 0(0-13.2)      | 6                    | 5.4(2.0-11.4)   | 10                 | 10.8(5.3-18.9)  | 9                  | 18.4(8.8-32.0)  | 2                 | 7.7(0.9-25.1)   |
| Nausea            | 5                    | 4.5(1.5-10.2)   | 13                 | 14.0(7.7-22.7)  | 1                  | 2.0(0.1-10.9)   | 0                 | 0(0-13.2)      | 0                    | 0(0-3.4)        | 3                  | 3.2(0.7-9.1)    | 1                  | 2.0(0.1-10.9)   | 0                 | 0(0-13.23)      |
| <b>Local</b>      |                      |                 |                    |                 |                    |                 |                   |                |                      |                 |                    |                 |                    |                 |                   |                 |
| Pain              | 33                   | 29.7(21.4-39.1) | 31                 | 33.3(23.9-43.9) | 6                  | 12.2(4.6-24.8)  | 3                 | 11.5(2.4-30.2) | 19                   | 17.1(10.6-25.4) | 27                 | 29.0(20.1-39.4) | 10                 | 20.4(10.2-34.3) | 5                 | 19.2(6.6-39.4)  |
| Tenderness        | 26                   | 23.4(15.9-32.4) | 24                 | 25.8(17.3-35.9) | 3                  | 6.1(1.3-16.9)   | 3                 | 11.5(2.4-30.2) | 11                   | 9.9(5.1-17.0)   | 17                 | 18.3(11.0-27.6) | 10                 | 20.4(10.2-34.3) | 3                 | 11.5(2.4-30.2)  |
| Itch              | 1                    | 0.9(0.0-4.9)    | 1                  | 1.1(0.0-5.8)    | 1                  | 2.0(0.1-10.9)   | 0                 | 0(0-13.2)      | 0                    | 0(0-3.2)        | 3                  | 3.2(0.7-9.1)    | 1                  | 2.0(0.1-10.9)   | 0                 | 0(0-13.2)       |
| Redness           | 6                    | 5.4(46.1-65.3)  | 7                  | 7.5(3.1-14.9)   | 1                  | 2.0(0.1-10.9)   | 0                 | 0(0-13.2)      | 2                    | 1.8(0.2-6.4)    | 4                  | 4.3(1.2-10.6)   | 2                  | 4.1(5.0-14.0)   | 0                 | 0(0-13.2)       |
| <b>Total</b>      |                      |                 |                    |                 |                    |                 |                   |                |                      |                 |                    |                 |                    |                 |                   |                 |
| Systemic          | 62                   | 55.9(46.1-65.3) | 50                 | 53.8(43.1-64.2) | 8                  | 16.3(7.3-29.7)  | 4                 | 15.4(4.4-34.9) | 18                   | 16.2(9.9-24.4)  | 30                 | 32.3(22.4-42.8) | 18                 | 36.7(23.4-51.7) | 5                 | 19.2(6.6-39.4)  |
| Local             | 40                   | 36.0(27.1-45.7) | 37                 | 39.8(29.8-50.5) | 7                  | 14.3(5.9-27.2)  | 4                 | 15.4(4.4-34.9) | 20                   | 18.0(11.4-26.4) | 29                 | 31.1(22.0-41.6) | 13                 | 26.5(14.9-41.1) | 6                 | 23.1(9.0-44.0)  |
| Overall           | 62                   | 55.9(46.1-65.3) | 60                 | 64.5(53.9-74.8) | 11                 | 22.5(11.8-36.6) | 5                 | 19.2(6.6-39.4) | 28                   | 25.2(17.5-34.4) | 35                 | 37.6(27.8-48.3) | 21                 | 42.9(28.8-57.8) | 7                 | 26.9(11.6-47.8) |
| Medical attention | 4                    | 3.6(1.0-9.0)    | 24                 | 25.8(17.3-35.3) | 5                  | 10.2(3.4-22.2)  | 1                 | 3.9(0.1-19.6)  | 2                    | 1.8(0.2-6.4)    | 3                  | 3.2(0.7-9.1)    | 7                  | 14.3(5.9-27.2)  | 2                 | 7.7(0.9-25.1)   |

BNT: Comirnaty (BNT162b2, BioNTech-Pfizer, Mainz, Germany/New York, United States (US); ChAd: Vaxrevia (ChAdOx1/nCoV-19, AstraZeneca, Cambridge, United Kingdom (UK).

Please note individuals could report more than one reaction therefore totals do not match the sum of the symptoms.

## S.6 Overall symptom severity by vaccination schedule

Severity of combined local and systemic reaction after prime and boost vaccination by vaccination schedule.

Severity is presented as the highest severity as self-reported by the participant. Grading was categorised as Grade 1 = Mild – easily tolerated with no limitation on normal activity, Grade 2 = Moderate – some limitation of daily activity, Grade 3 = Severe – unable to perform normal daily activity and Grade 4 = Emergency department or hospital admission required. Individual graphs are grouped into “No previous infection” - those that reported no previous symptoms nor a positive test, “Previous symptoms” – those that reported symptoms but no positive test, “Positive test” – have previously tested positive for SARS-CoV-2, “Under 50 year-olds”, “Over 50 year-olds”, “Females” and “Males”.

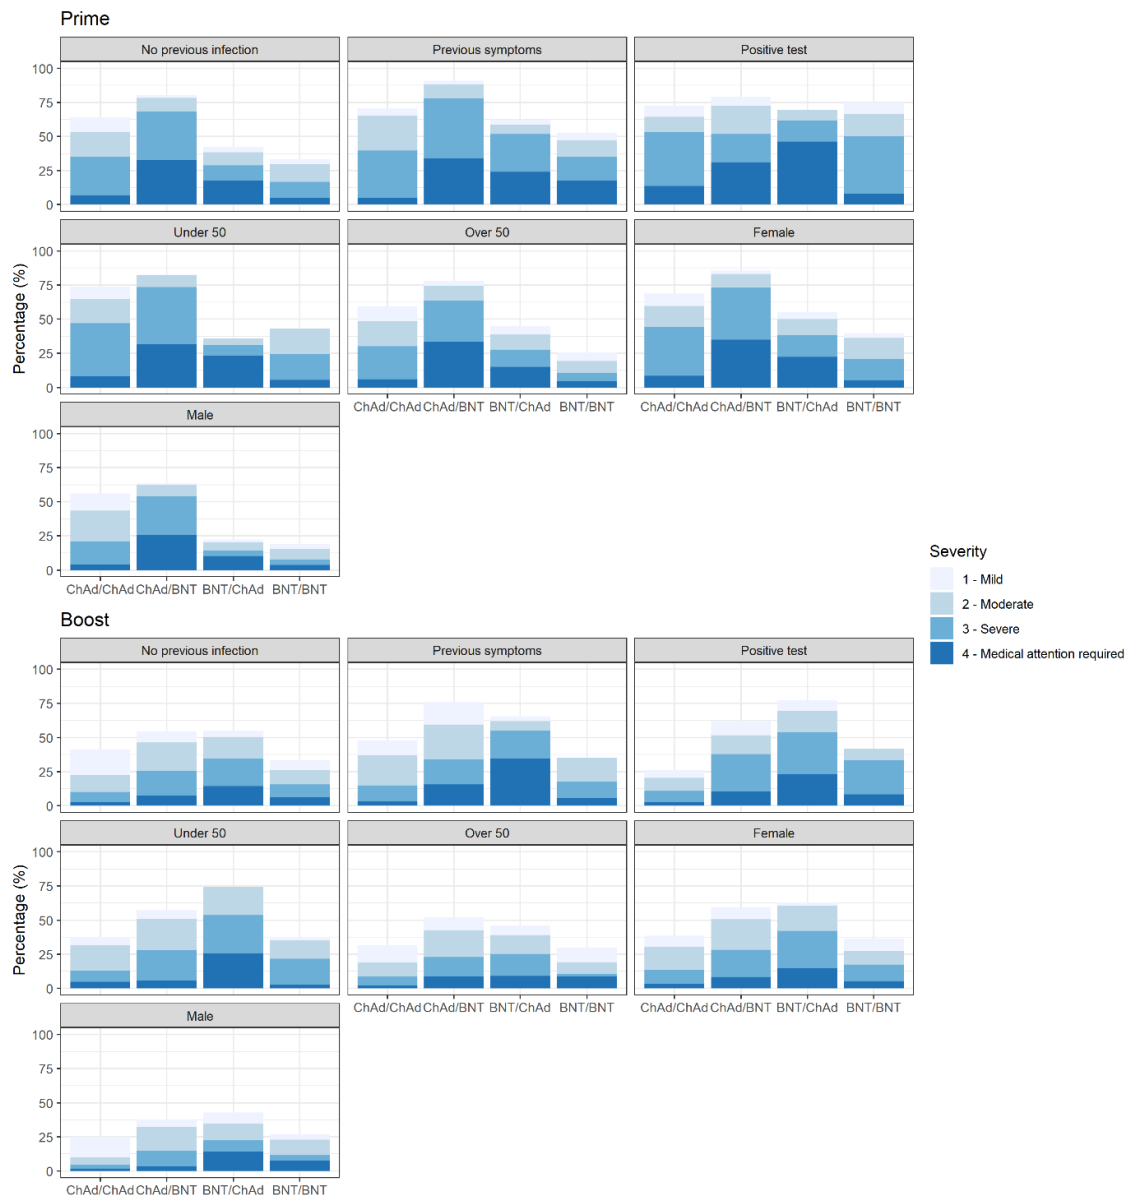

### S.7 Severity of reactions after first and second dose by vaccination schedule

The total number of people who did not report previous symptoms of COVID-19 nor confirmed infection and reported severe reactions (Grades 3 or 4) for their second dose of the vaccine by those that reported severe reactions after their first dose and those that reported non-severe reactions (Grades 0-2) after their first dose by vaccination schedule.

Grade 0 = No symptoms, Grade 1 = Mild – easily tolerated with no limitation on normal activity, Grade 2 = Moderate – some limitation of daily activity, Grade 3 = Severe – unable to perform normal daily activity and Grade 4 = Emergency department or hospital admission required.

| Severe reaction after 1st dose     | 2nd dose | Severe Reaction After 2 <sup>nd</sup> dose |                  |
|------------------------------------|----------|--------------------------------------------|------------------|
|                                    |          | n/N                                        | % (95%CI)        |
| ChAd                               | ChAd     | 22/101                                     | 21.8 (14.2-31.1) |
|                                    | BNT      | 79/267                                     | 29.6 (24.2-35.5) |
| BNT                                | ChAd     | 17/36                                      | 47.2 (40.4-64.5) |
|                                    | BNT      | 6/14                                       | 42.9 (17.7-71.1) |
| Non-severe reaction after 1st dose |          |                                            |                  |
| ChAd                               | ChAd     | 8/186                                      | 4.3 (1.9-8.3)    |
|                                    | BNT      | 21/123                                     | 17.1 (10.9-24.9) |
| BNT                                | ChAd     | 26/89                                      | 29.1 (20.1-39.8) |
|                                    | BNT      | 7/70                                       | 10.0 (4.1-19.5)  |

BNT: Comirnaty (BNT162b2, BioNTech-Pfizer, Mainz, Germany/New York, United States (US); ChAd: Vaxzevria (ChAdOx1/nCoV-19, AstraZeneca, Cambridge, United Kingdom (UK).
